# Supplementary material for: Liver injury-on-a-chip: microfluidic co-cultures with integrated biosensors for monitoring liver cell signaling during injury
Source: Royal Society of Chemistry journal article supplement (doi:10.1039/c5lc00874c), 2015-01-01

## Supplementary Information

### **Liver Injury-on-a-Chip: Microfluidic Co-Cultures with Integrated Biosensors for Monitoring Liver Cell Signaling During Injury**

Qing Zhou<sup>#1</sup>, Dipali Patel<sup>#1</sup>, Timothy Kwa<sup>1</sup>, Amranul Haque<sup>1</sup>, Zimple Matharu<sup>1</sup>, Gulnaz Stybayeva<sup>1</sup>, Yandong Gao<sup>1</sup>, Anna Mae Diehl<sup>2</sup>, Alexander Revzin<sup>1</sup>

#### **Affiliation:**

<sup>1</sup> *Department of Biomedical Engineering, University of California, Davis, 451 Health Sciences, Davis, CA, USA.*

<sup>2</sup> *Division of Gastroenterology, Department of Medicine, Duke University, 595 LaSalle Street, Snyderman Building, Suite 1073, Durham, NC*

\* Correspondence and requests for materials should be addressed to:

Alexander Revzin (arevzin@ucdavis.edu)

## **Supplementary Figure Legends**

**Supplementary Figure 1.** Maintenance of epithelial phenotype of hepatocyte and quiescent phenotype of stellate cells inside microchambers. Immunostaining images of epithelia marker (Albumin, green) and quiescent stellate cell marker (GFAP, red) in hepatocytes and stellate cells, respectively. Cells were cultured for 7 days inside microchambers and standard tissue culture plates pre-coated with collagen type I. DAPI was used to stain nucleus. Scale bar: 50  $\mu\text{m}$ . GFAP: Glial Fibrillary Acidic Protein.

**Supplementary Figure 2. Alcohol injured hepatocytes activates neighboring stellate cells.** Expression of  $\alpha$ -smooth muscle actin ( $\alpha$ -SMA, green) in stellate cells cultured for 48 h inside microchambers next to healthy hepatocytes [EtOH (-)] and hepatocytes injured for 48 h with alcohol [EtOH (+)]. DAPI (blue) was used to stain nucleus.

**Supplementary Figure 3.** Layout of the three-layer sensing device containing micropatterned electrodes on the substrate and the reconfigurable PDMS top layers.

**Supplementary Figure 4.** Proof -of-concept experiments to demonstrate the independent operation of electrode columns in sensing channels. (A) Alexa 546 solution was infused in all three sensing channels (a,b,c). (B-D) Sensing channels were selectively actuated via vacuum control. Corresponding graphs represent fluorescence intensity of acquired signals.

**Supplementary Figure 5.** Selective stimulation of sensing chambers with recombinant TGF- $\beta$ . (a-c) 100ng/ml recombinant TGF- $\beta$  was infused into two cell culture chambers, followed by sequential exposure of electrode column a, column b and column c, with one after another. The activation of designated electrode columns was reflected by the suppression of SWV curves in panel a, b and c. The black arrows indicate the appliance of negative pressure in correspondent control chamber.

**Supplementary Figure 6.** Numerical simulation of the cytokine diffusion and surface binding process. (a-b) Simulated signal (Blue) under assumed secretion rate ( $\sigma_H = 0.00576\text{pg/h}$ ;  $\sigma_s = 0.00159\text{pg/h}$ ) and real experimental data (Red) plotted over time for comparison purpose. (c) Concentration distribution of cytokine (TGF- $\beta$ 1) in the microfluidic chamber predicted by the computational model.

Supplementary Figure 1

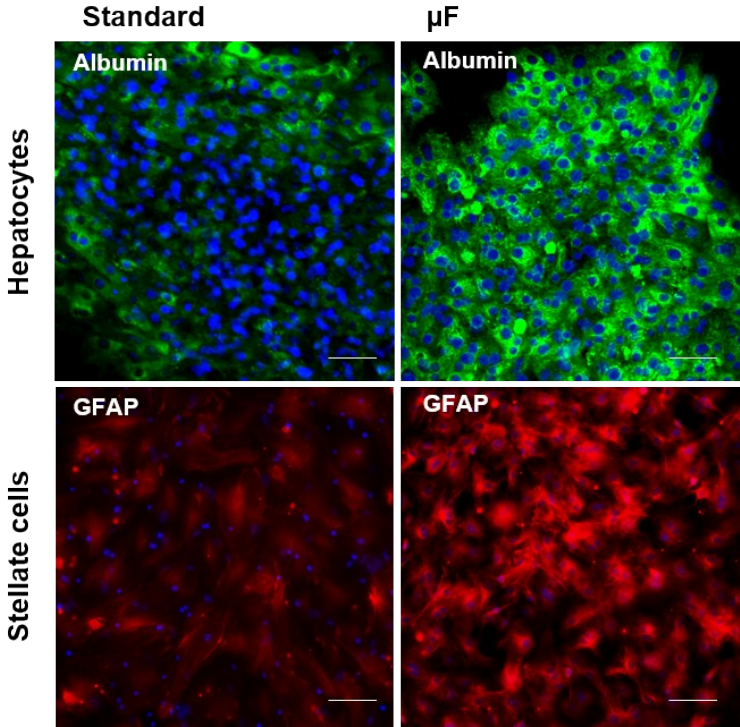

Supplementary Figure 2

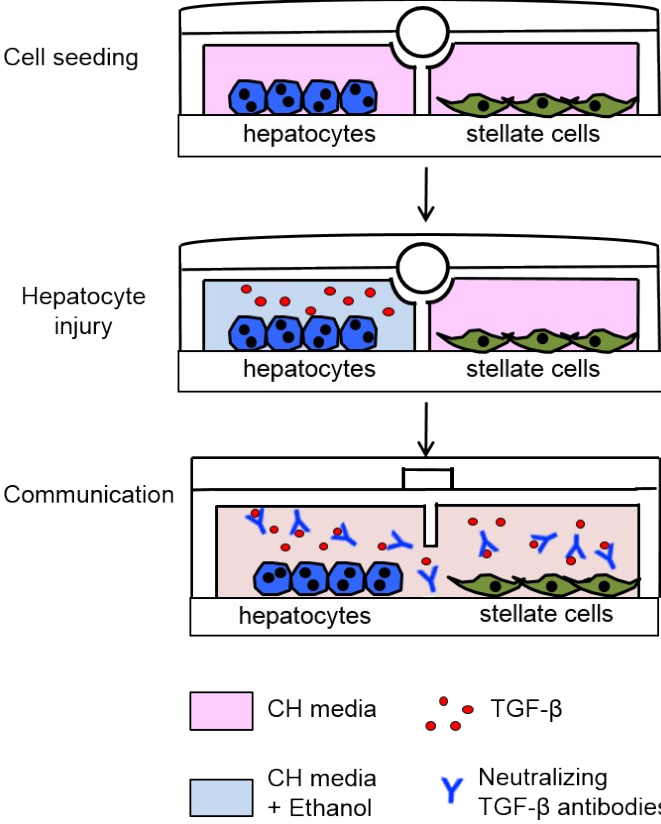

Supplementary Figure 3

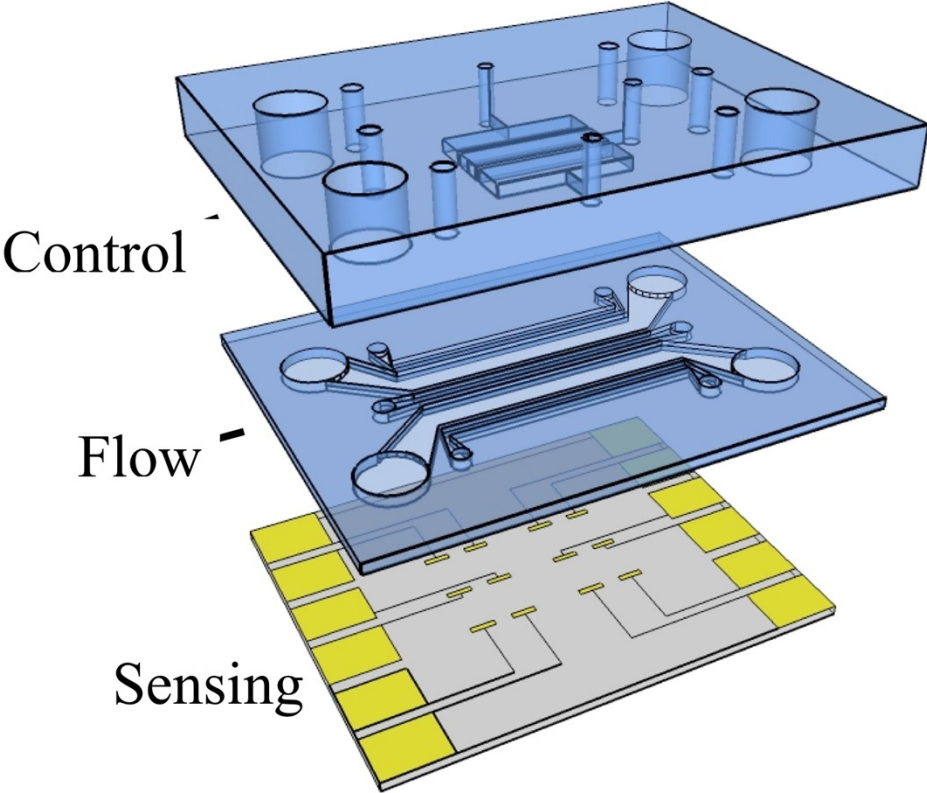

Supplementary Figure 4

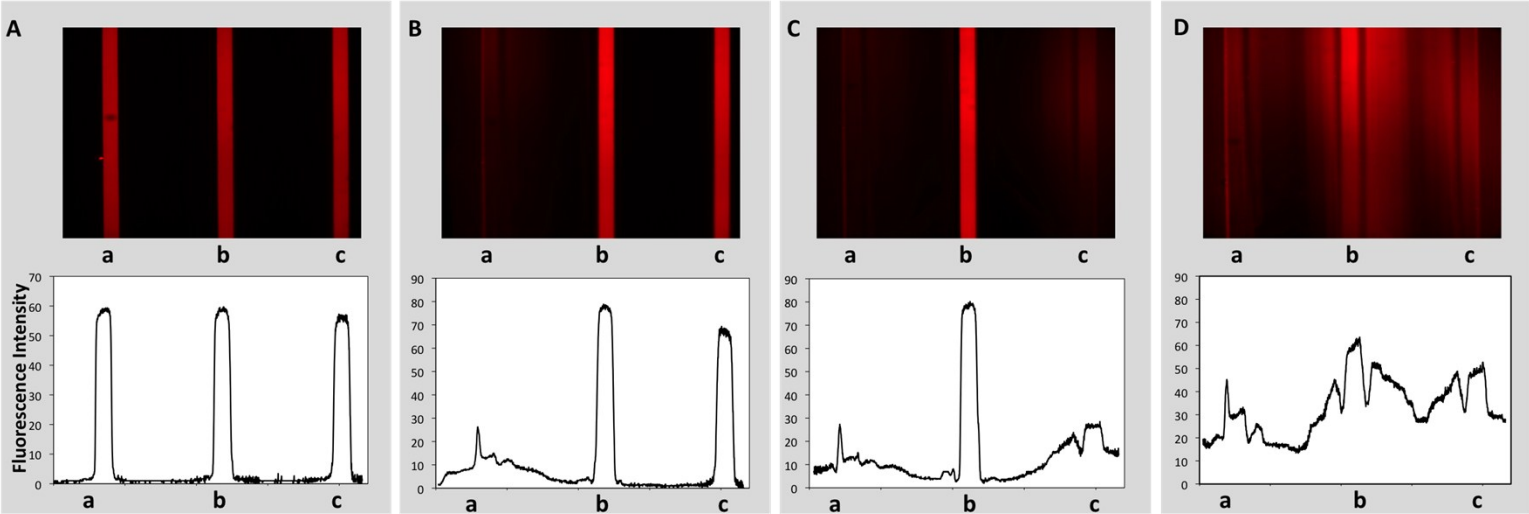

## Supplementary Figure 5

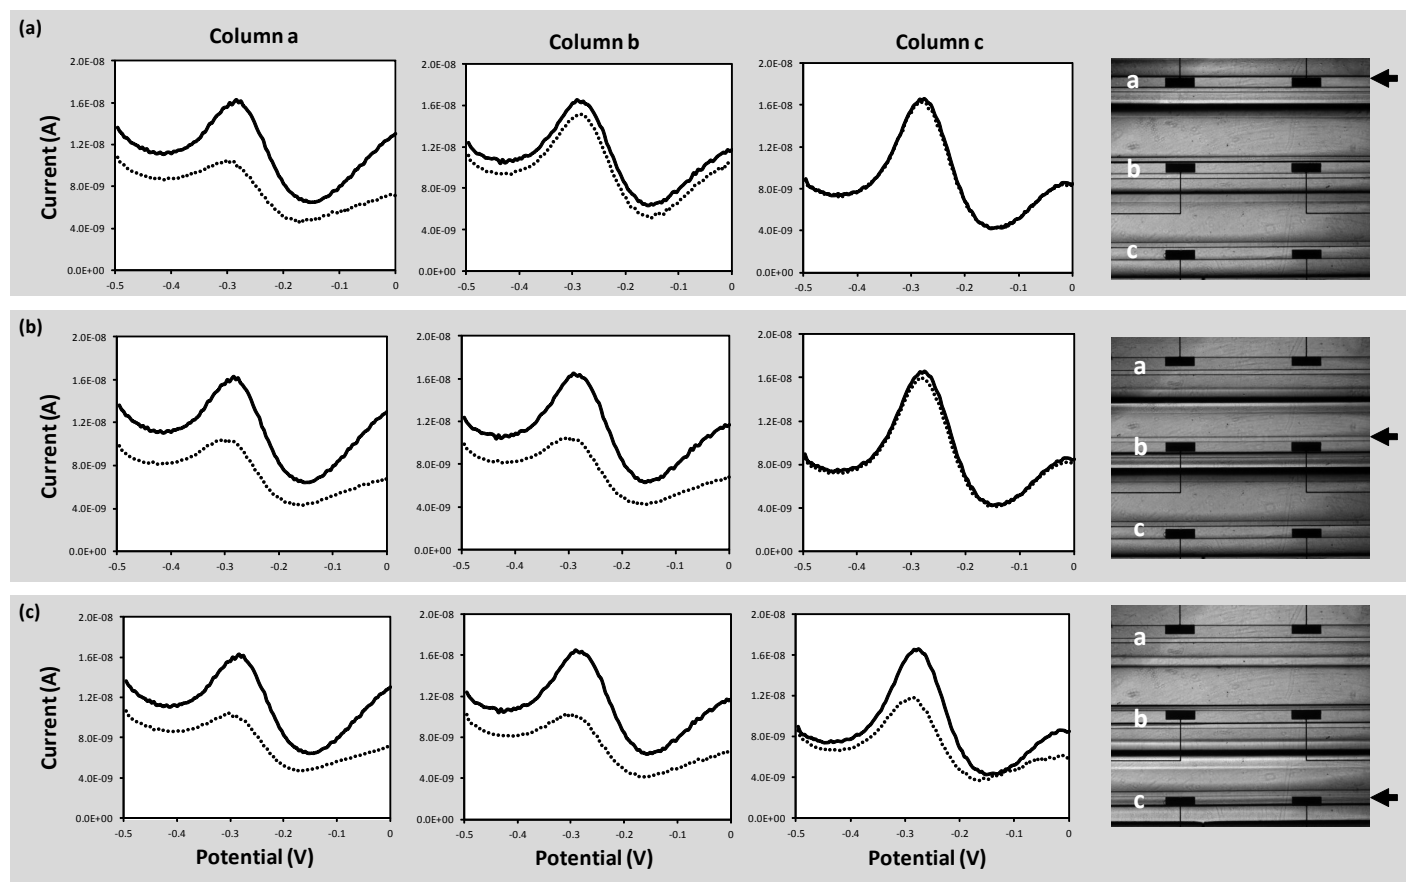



Supplementary Figure 6

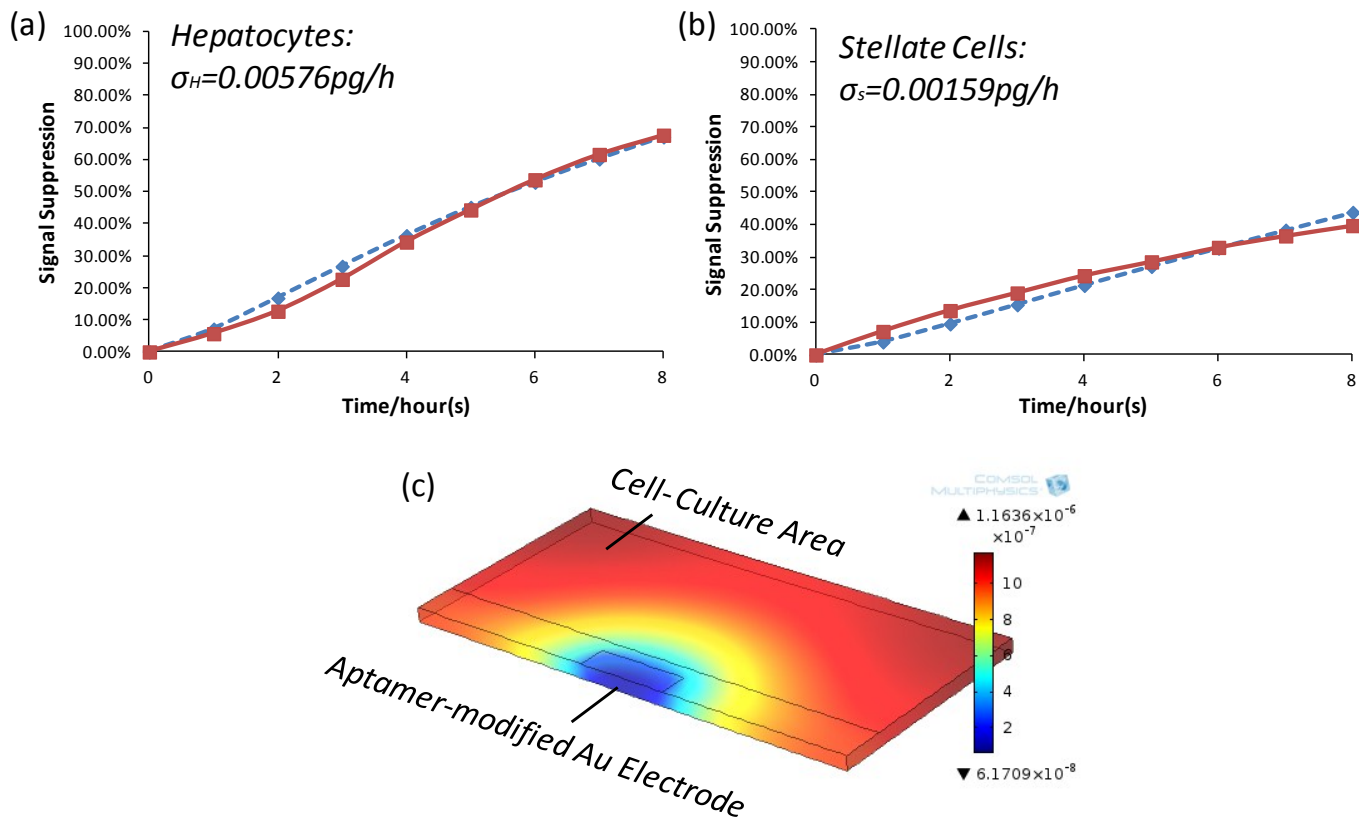

Supplement: c5lc00874c1.pdf [file c5lc00874c1.pdf]
